# Supplementary material for: An Ephemeral Sexual Population of Phytophthora infestans in the Northeastern United States and Canada
Source: PubMed Central journal article supplement (PMC4281225; doi:10.1371/journal.pone.0116354), 2014-12-31
Supplement: pone.0116354.s001.pdf [file pone.0116354.s001.pdf]

### Parental Exclusion Analyses

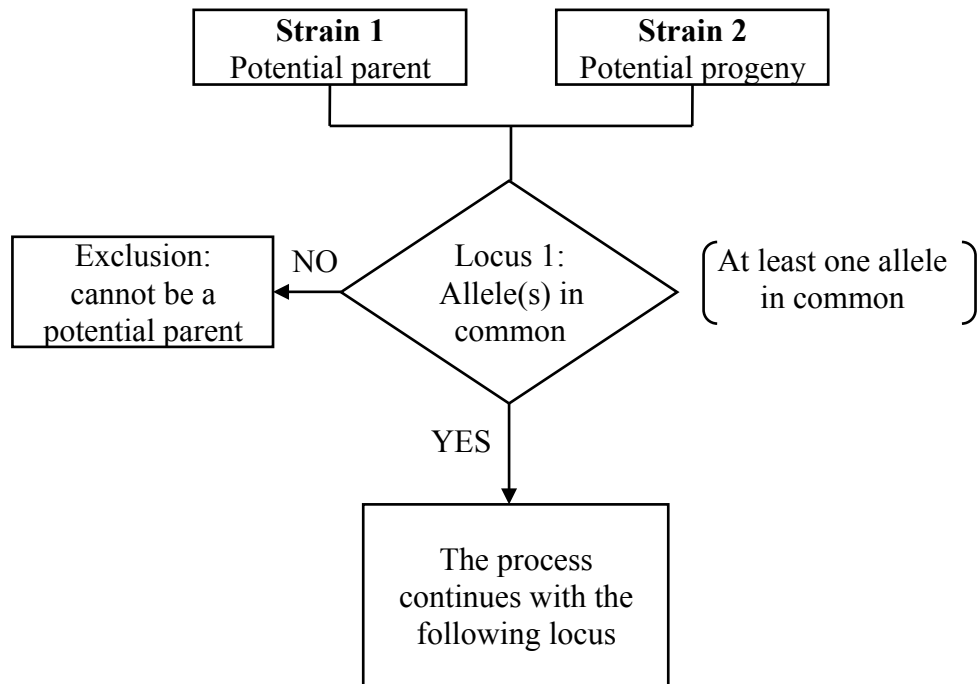

**Figure S1. Flow diagram showing how the parentage exclusion analyses were conducted.** A visual parentage exclusion analyses was possible given that there were only 37 unique *Phytophthora infestans* genotypes.
