# Supplementary material for: An Ephemeral Sexual Population of Phytophthora infestans in the Northeastern United States and Canada
Source: PubMed Central journal article supplement (PMC4281225; doi:10.1371/journal.pone.0116354), 2014-12-31
Supplement: pone.0116354.s005.pdf [file pone.0116354.s005.pdf]

**Table S1. *Phytophthora infestans* isolates used in this study.**

| <b>Multilocus Genotype</b> | <b>Isolate</b> | <b>Location<br/>County/State abbreviation<br/>or Country/Geographic<br/>coordinates</b> | <b>Original host</b> | <b>Year</b> | <b>Collector</b>  |
|----------------------------|----------------|-----------------------------------------------------------------------------------------|----------------------|-------------|-------------------|
| US-1                       | SA960008       | Mpumalanga, South Africa/<br>26°S 30°E                                                  | Potato               | 1996        | Adele McLeod      |
| US-6                       | Coffey7629     | USA                                                                                     | -                    | -           | Michael D. Coffey |
| US-7                       | Coffey7723     | USA                                                                                     | -                    | -           | Michael D. Coffey |
| US-8                       | US100028       | Dufferin/ON Canada/<br>44°05'N 80°12'W                                                  | Potato               | 2010        | Eugenia Banks     |
|                            | US110063       | Erie/PA/<br>42.10°N 80.10°W                                                             | Potato               | 2011        | Andrew Musa       |
|                            | US110102       | Pasco/WA/<br>46°14'19"N 119°6'31"W                                                      | Potato               | 2011        | Niklaus Grünwald  |
| US-11                      | US050007       | Benton/OR/<br>44°29'25"N 123°25'57"W                                                    | Tomato               | 2005        | Melody Putnam     |
|                            | US110028       | Oneida/NY/<br>43.24°N 75.44°W                                                           | Tomato               | 2011        | Jerry Waskiewicz  |
| US-12                      | US940494       | Tompkins/NY/<br>42.45°N 76.47°W                                                         | Tomato               | 1994        | William Fry       |
| US-14                      | Pi-001-01      | MI/<br>44°N 85°W                                                                        | -                    | -           | Ken Deahl         |
| US-16                      | Coffey10112    | OR/<br>44°N 120.5°W                                                                     | -                    | 1994        | Michael D. Coffey |
| US-17                      | US970001       | Lee/FL/<br>26.58°N 81.92°W                                                              | Tomato               | 1997        | William Fry       |
| US-19                      | NC09719        | NC/<br>35.5°N 80°W                                                                      | Tomato               | 1997        | Jean Ristaino     |
| US-20                      | NC046          | NC/<br>35.5°N 80°W                                                                      | Tomato               | 2004        | Jean Ristaino     |
| US-21                      | NC0719         | NC/<br>35.5°N 80°W                                                                      | Tomato               | 2007        | Jean Ristaino     |
| US-22                      | US070001       | Suffolk/NY/<br>40.94°N 72.68°W                                                          | Tomato               | 2007        | Margaret McGrath  |
|                            | US090029       | Orange/NY/<br>41.40°N 74.31°W                                                           | Tomato               | 2009        | CPDDC             |

|          |          |                                   |            |      |                  |
|----------|----------|-----------------------------------|------------|------|------------------|
|          | US090042 | Chautauqua/NY/<br>42.30°N 79.41°W | Tomato     | 2009 | CPDDC            |
| US-23var | BL2009P4 | Blair/PA/<br>40.47°N 78.35°W      | Potato     | 2009 | Ken Deahl        |
| US-23    | Pi431    | -                                 | -          | 2013 | Dawn Tidd        |
|          | Pi432    | -                                 | -          | 2013 | Dawn Tidd        |
|          | US110017 | Suffolk/NY/<br>40.94°N 72.68°W    | Tomato     | 2011 | Margaret McGrath |
|          | US110040 | Waukesha/WI/<br>43.02°N 88.31°W   | Tomato     | 2011 | Amanda Gevens    |
|          | US110062 | Aroostook/ME/<br>46.65°N 68.59°W  | Potato     | 2011 | Steve Johnson    |
| US-24    | ND822Pi  | ND/<br>47°N 100°W                 | Tomato     | 2009 | Gary Secor       |
|          | US110004 | ND/<br>47°N 100°W                 | Potato     | 2011 | Gary Secor       |
|          | US110159 | Cass/ND/<br>46.93°N 97.25°W       | Potato     | 2011 | Gary Secor       |
| GDT-01   | US110057 | Ontario/NY/<br>42.85°N 77.29°W    | Tomato     | 2011 | Christine Smart  |
|          | US110058 | Ontario/NY/<br>42.85°N 77.29°W    | Tomato     | 2011 | Christine Smart  |
|          | US110066 | Ontario/NY/<br>42.85°N 77.29°W    | Tomato     | 2011 | Christine Smart  |
|          | US110073 | Wayne/NY/<br>43.28°N 77.05°W      | Potato     | 2011 | Christine Smart  |
|          | US110084 | Ontario/NY/<br>42.85°N 77.29°W    | Tomato     | 2011 | Christine Smart  |
|          | US110135 | Ontario/NY/<br>42.85°N 77.29°W    | Nightshade | 2011 | Christine Smart  |
| GDT-02   | US110064 | Genesee/NY/<br>43.00°N 78.19°W    | Potato     | 2011 | Christine Smart  |
| GDT-03   | US110086 | Monroe/NY/<br>43.30°N 77.69°W     | Potato     | 2011 | Christine Smart  |
| GDT-04   | US110060 | Wyoming/NY/<br>42°50'N 78°5'W     | Tomato     | 2011 | Don Casiewicz    |
|          | US110065 | Livingston/NY/<br>42.73°N 77.77°W | Tomato     | 2011 | Christine Smart  |
|          | US110074 | Genesee/NY/<br>43.00°N 78.19°W    | Tomato     | 2011 | Christine Smart  |
|          | US110075 | Genesee/NY/<br>43.00°N 78.19°W    | Tomato     | 2011 | Christine Smart  |

|          |          |                                           |            |      |                 |
|----------|----------|-------------------------------------------|------------|------|-----------------|
|          | US110078 | Tompkins/NY/<br>42.45°N 76.47°W           | Tomato     | 2011 | Keith Perry     |
|          | US110094 | Tompkins/NY/<br>42.45°N 76.47°W           | Tomato     | 2011 | Cliff Kraft     |
| GDT-05   | US110061 | Cayuga/NY/<br>42.94°N 76.56°W             | Tomato     | 2011 | Sharon Bachman  |
| GDT-06   | US110093 | Tompkins/NY/<br>42.45°N 76.47°W           | Tomato     | 2011 | Lisa Hahn       |
| GDT-07   | US110072 | Genesee/NY/<br>43.00°N 78.19°W            | Potato     | 2011 | Christine Smart |
| GDT-08   | US110071 | Tompkins/NY/<br>42.45°N 76.47°W           | Tomato     | 2011 | Monica Roth     |
|          | US110114 | Tompkins/NY/<br>42.45°N 76.47°W           | Potato     | 2011 | William Fry     |
|          | US110128 | Tompkins/NY/<br>42.45°N 76.47°W           | Potato     | 2011 | William Fry     |
|          | US110141 | Yates/NY/<br>42.64°N 77.10°W              | Tomato     | 2011 | Abby Seaman     |
|          | US110142 | Tompkins/NY/<br>42.45°N 76.47°W           | Tomato     | 2011 | William Fry     |
| GDT-08.1 | US110069 | Tompkins/NY/<br>42.45°N 76.47°W           | Tomato     | 2011 | Tom Zitter      |
| GDT-09   | US110082 | Genesee/NY/<br>43.00°N 78.19°W            | Tomato     | 2011 | Christine Smart |
|          | US110138 | Genesee/NY/<br>43.00°N 78.19°W            | Tomato     | 2011 | Christine Smart |
|          | US110139 | Genesee/NY/<br>43.00°N 78.19°W            | Tomato     | 2011 | Christine Smart |
| GDT-10   | US110083 | Erie/NY/<br>42.75°N 78.78°W               | Tomato     | 2011 | Sharon Bachman  |
| GDT-11   | US110085 | Genesee/NY/<br>43.00°N 78.19°W            | Nightshade | 2011 | Christine Smart |
| GDT-12   | US100029 | Simcoe/ON Canada/<br>44°14'99"N 79.8632°W | Potato     | 2010 | Eugenia Banks   |
| GDT-13   | US100023 | Simcoe/ON Canada/<br>43°35'N 79°44'W      | Tomato     | 2010 | Catarina Saude  |
| GDT-14   | US110054 | Mercer/PA/<br>41.31°N 80.25°W             | Tomato     | 2011 | Beth Gugino     |
|          | US110079 | Venango/PA/                               | Tomato     | 2011 | Beth Gugino     |

|        |          |                                                   |        |      |                  |
|--------|----------|---------------------------------------------------|--------|------|------------------|
|        | US110106 | 41.40°N 79.76°W<br>Indiana/PA/<br>40.65°N 79.09°W | Tomato | 2011 | Beth Gugino      |
| GDT-15 | US100032 | Oxford/ON Canada/<br>43°14'N 80°36'W              | Potato | 2010 | Eugenia Banks    |
| GDT-16 | US100033 | Oxford/ON Canada/<br>43°14'N 80°36'W              | Tomato | 2010 | Eugenia Banks    |
| GDT-17 | US110092 | Erie/OH/<br>41.51°N 82.61°W                       | Tomato | 2011 | Sally Miller     |
| GDT-18 | US100022 | Genesee/NY/<br>43.00°N 78.19°W                    | Tomato | 2010 | Christine Smart  |
| GDT-19 | US100019 | Erie/NY/<br>42.75N 78.78°W                        | Tomato | 2010 | Carol MacNeil    |
| GDT-20 | US100034 | Niagara/NY/<br>43.32°N 78.79°W                    | Tomato | 2010 | Christy Hoepfing |

---

CPDDC: Cornell Plant Disease Diagnostic Clinic
