# Supplementary material for: An Ephemeral Sexual Population of Phytophthora infestans in the Northeastern United States and Canada
Source: PubMed Central journal article supplement (PMC4281225; doi:10.1371/journal.pone.0116354), 2014-12-31
Supplement: pone.0116354.s006.pdf [file pone.0116354.s006.pdf]

**Table S2. Mating type, and banding patterns for the allozyme *glucose-6-phosphate isomerase* and for a restriction fragment length polymorphism (RFLP) assay using the RG57 probe for the 20 unique NYS-2010/11 multilocus genotypes.** Polymorphic sites for the RFLP assay using the RG57 probe are highlighted in grey. Seven of the 24 possible combinations are observed within the 20 NYS-2010/11 genotypes.

| MLG <sup>a</sup>   | MT <sup>b</sup> | GPI <sup>c</sup> | MH <sup>d</sup> | RG57 <sup>e</sup> |   |   |   |   |   |   |   |   |    |    |    |    |    |    |    |    |    |    |    |    |    |    |    |     |    |
|--------------------|-----------------|------------------|-----------------|-------------------|---|---|---|---|---|---|---|---|----|----|----|----|----|----|----|----|----|----|----|----|----|----|----|-----|----|
|                    |                 |                  |                 | 1                 | 2 | 3 | 4 | 5 | 6 | 7 | 8 | 9 | 10 | 11 | 12 | 13 | 14 | 15 | 16 | 17 | 18 | 19 | 20 | 21 | 22 | 23 | 24 | 24a | 25 |
| US-1               | A1              | 86/100           | H22             | 1                 | 0 | 1 | 1 | 1 | 0 | 1 | 0 | 1 | 1  | 0  | 0  | 1  | 1  | 0  | 1  | 0  | 0  | 0  | 1  | 1  | 0  | 0  | 1  | 0   | 1  |
| US-6               | A1              | 100/100          | -               | 1                 | 0 | 1 | 1 | 1 | 1 | 1 | 0 | 0 | 1  | 0  | 0  | 1  | 1  | 0  | 0  | 0  | 1  | 0  | 1  | 1  | 0  | 0  | 1  | 0   | 1  |
| US-7               | A2              | 100/111          | -               | 1                 | 0 | 0 | 1 | 1 | 0 | 0 | 0 | 0 | 1  | 0  | 0  | 1  | 1  | 0  | 1  | 0  | 1  | 0  | 1  | 1  | 0  | 0  | 1  | 0   | 1  |
| US-8               | A2              | 100/111/122      | H20             | 1                 | 0 | 0 | 1 | 1 | 0 | 0 | 0 | 0 | 1  | 0  | 0  | 1  | 1  | 0  | 1  | 0  | 0  | 0  | 1  | 1  | 0  | 1  | 1  | 0   | 1  |
| US-11              | A1              | 100/100/111      | H1              | 1                 | 0 | 1 | 0 | 1 | 1 | 1 | 0 | 0 | 1  | 0  | 0  | 1  | 1  | 0  | 1  | 0  | 1  | 0  | 1  | 1  | 0  | 0  | 1  | 0   | 1  |
| US-12              | A1              | 100/111          | -               | 1                 | 0 | 0 | 0 | 1 | 0 | 0 | 0 | 0 | 1  | 0  | 0  | 1  | 1  | 0  | 0  | 0  | 1  | 0  | 1  | 1  | 0  | 0  | 1  | 0   | 1  |
| US-14              | A2              | 100/122          | -               | 1                 | 0 | 0 | 0 | 1 | 0 | 0 | 0 | 0 | 1  | 0  | 0  | 1  | 1  | 0  | 1  | 0  | 0  | 0  | 1  | 1  | 0  | 1  | 1  | 0   | 1  |
| US-16              | A1              | 100/111          | -               | 1                 | 0 | 0 | 0 | 1 | 1 | 0 | 0 | 0 | 1  | 0  | 0  | 1  | 1  | 0  | 1  | 0  | 1  | 0  | 1  | 1  | 0  | 0  | 1  | 0   | 1  |
| US-17              | A1              | 100/122          | H28             | 1                 | 0 | 1 | 0 | 0 | 0 | 1 | 0 | 0 | 0  | 0  | 0  | 1  | 1  | 0  | 1  | 0  | 1  | 0  | 1  | 1  | 0  | 0  | 1  | 0   | 1  |
| US-19              | A2              | 100/100          | -               | 1                 | 0 | 1 | 0 | 1 | 0 | 1 | 0 | 0 | 0  | 0  | 0  | 1  | 1  | 0  | 1  | 0  | 0  | 0  | 1  | 1  | 0  | 0  | 1  | 0   | 1  |
| US-20              | A2              | 100/100          | -               | 1                 | 0 | 1 | 0 | 1 | 0 | 1 | 0 | 0 | 1  | 0  | 0  | 1  | 1  | 0  | 1  | 0  | 1  | 0  | 1  | 1  | 0  | 0  | 1  | 0   | 1  |
| US-21              | A2              | 100/122          | H20             | 1                 | 0 | 0 | 0 | 1 | 0 | 0 | 0 | 0 | 1  | 0  | 0  | 1  | 1  | 0  | 0  | 0  | 0  | 0  | 1  | 1  | 0  | 1  | 1  | 0   | 1  |
| US-22              | A2              | 100/122          | H20             | 1                 | 0 | 0 | 0 | 1 | 0 | 0 | 0 | 0 | 0  | 0  | 0  | 1  | 1  | 0  | 1  | 0  | 0  | 0  | 1  | 1  | 0  | 0  | 1  | 0   | 1  |
| US-23 <sup>f</sup> | A1              | 100/100          | H25             | 1                 | 1 | 0 | 0 | 1 | 1 | 0 | 0 | 0 | 1  | 0  | 0  | 1  | 1  | 0  | 0  | 1  | 0  | 1* | 1  | 1  | 1* | 0  | 1  | 1   | 1  |
| US-24              | A1              | 100/100          | H13             | 1                 | 0 | 1 | 0 | 1 | 0 | 1 | 0 | 0 | 1  | 0  | 0  | 1  | 1  | 0  | 1  | 0  | 0  | 0  | 1  | 1  | 0  | 1  | 1  | 0   | 1  |
| GDT-01             | A1              | 100/100          | H20             | 1                 | 0 | 0 | 0 | 1 | 0 | 0 | 0 | 0 | 0  | 0  | 0  | 1  | 1  | 0  | 1  | 0  | 0  | 0  | 1  | 1  | 1  | 0  | 1  | 0   | 1  |
| GDT-02             | A2              | 111/122          | H20             | 1                 | 0 | 0 | 0 | 1 | 0 | 0 | 0 | 0 | 0  | 0  | 0  | 1  | 1  | 0  | 1  | 0  | 0  | 1  | 1  | 1  | 1  | 0  | 1  | 0   | 1  |
| GDT-03             | A2              | 100/111/122      | H20             | 1                 | 0 | 0 | 0 | 1 | 0 | 0 | 0 | 0 | 0  | 0  | 0  | 1  | 1  | 0  | 1  | 0  | 0  | 1  | 1  | 1  | 1  | 0  | 1  | 0   | 1  |
| GDT-04             | A2              | 100/111          | H20             | 1                 | 0 | 0 | 0 | 1 | 0 | 0 | 0 | 0 | 0  | 0  | 0  | 1  | 1  | 0  | 1  | 0  | 0  | 0  | 1  | 1  | 0  | 1  | 0  | 1   | 1  |
| GDT-05             | A1              | 100/111          | H20             | 1                 | 0 | 0 | 0 | 1 | 0 | 0 | 0 | 0 | 0  | 0  | 0  | 1  | 1  | 0  | 1  | 0  | 0  | 0  | 1  | 1  | 0  | 0  | 1  | 0   | 1  |

|        |    |         |     |   |   |   |   |   |   |   |   |   |   |   |   |   |   |   |   |   |   |   |   |   |   |   |   |
|--------|----|---------|-----|---|---|---|---|---|---|---|---|---|---|---|---|---|---|---|---|---|---|---|---|---|---|---|---|
| GDT-06 | A2 | 100/111 | H20 | 1 | 0 | 0 | 0 | 1 | 0 | 0 | 0 | 0 | 0 | 0 | 0 | 1 | 1 | 0 | 1 | 0 | 0 | 0 | 1 | 0 | 1 |   |   |
| GDT-07 | A2 | 100/111 | H20 | 1 | 0 | 0 | 0 | 1 | 0 | 0 | 0 | 0 | 0 | 0 | 1 | 1 | 0 | 0 | 0 | 1 | 1 | 1 | 0 | 1 | 0 | 1 |   |
| GDT-08 | A1 | 100/111 | H20 | 1 | 0 | 0 | 0 | 1 | 0 | 0 | 0 | 0 | 0 | 0 | 1 | 1 | 0 | 1 | 1 | 1 | 1 | 0 | 0 | 1 | 0 | 1 |   |
| GDT-09 | A2 | 100/122 | H20 | 1 | 0 | 0 | 0 | 1 | 0 | 0 | 0 | 0 | 0 | 0 | 1 | 1 | 0 | 1 | 0 | 1 | 1 | 0 | 0 | 1 | 0 | 1 |   |
| GDT-10 | A1 | 100/122 | H20 | 1 | 0 | 0 | 0 | 1 | 0 | 0 | 0 | 0 | 0 | 0 | 1 | 1 | 0 | 1 | 0 | 1 | 1 | 1 | 0 | 1 | 0 | 1 |   |
| GDT-11 | A1 | 111/111 | H20 | 1 | 0 | 0 | 0 | 0 | 0 | 0 | 0 | 0 | 0 | 0 | 1 | 1 | 0 | 1 | 0 | 1 | 1 | 0 | 0 | 1 | 0 | 1 |   |
| GDT-12 | A1 | 100/111 | H20 | 1 | 0 | 0 | 0 | 1 | 0 | 0 | 0 | 0 | 0 | 0 | 1 | 1 | 0 | 1 | 0 | 1 | 1 | 1 | 0 | 0 | 1 | 0 | 1 |
| GDT-13 | A2 | 100/111 | H20 | 1 | 0 | 0 | 0 | 1 | 0 | 0 | 0 | 0 | 0 | 0 | 1 | 1 | 0 | 1 | 0 | 1 | 1 | 1 | 0 | 0 | 1 | 0 | 1 |
| GDT-14 | A1 | 111/122 | H20 | 1 | 0 | 0 | 0 | 1 | 0 | 0 | 0 | 0 | 0 | 0 | 1 | 1 | 0 | 1 | 0 | 0 | 1 | 1 | 0 | 0 | 1 | 0 | 1 |
| GDT-15 | A2 | 111/122 | H20 | 1 | 0 | 0 | 0 | 1 | 0 | 0 | 0 | 0 | 0 | 0 | 1 | 1 | 0 | 1 | 0 | 1 | 1 | 0 | 0 | 1 | 0 | 1 |   |
| GDT-16 | A2 | 111/122 | H20 | 1 | 0 | 0 | 0 | 1 | 0 | 0 | 0 | 0 | 0 | 0 | 1 | 1 | 0 | 1 | 0 | 1 | 1 | 0 | 0 | 1 | 0 | 1 |   |
| GDT-17 | A2 | 100/122 | H20 | 1 | 0 | 0 | 0 | 1 | 0 | 0 | 0 | 0 | 0 | 0 | 1 | 1 | 0 | 1 | 0 | 1 | 1 | 1 | 0 | 1 | 0 | 1 |   |
| GDT-18 | A2 | 100/111 | H20 | 1 | 0 | 0 | 0 | 1 | 0 | 0 | 0 | 0 | 0 | 0 | 1 | 1 | 0 | 0 | 0 | 1 | 1 | 1 | 0 | 1 | 0 | 1 |   |
| GDT-19 | A1 | 100/100 | H20 | 1 | 0 | 0 | 0 | 1 | 0 | 0 | 0 | 0 | 0 | 0 | 1 | 1 | 0 | 0 | 0 | 1 | 1 | 0 | 0 | 1 | 0 | 1 |   |
| GDT-20 | A1 | 100/111 | H20 | 1 | 0 | 0 | 0 | 1 | 0 | 0 | 0 | 0 | 0 | 0 | 1 | 1 | 0 | 0 | 0 | 1 | 1 | 0 | 0 | 1 | 0 | 1 |   |

<sup>a</sup> Multilocus genotype

<sup>b</sup> Mating type

<sup>c</sup> Glucose-6-phosphate isomerase

<sup>d</sup> Mitochondrial haplotype

<sup>e</sup> Restriction Fragment Length Polymorphism (RFLP) bands using the RG57 probe

<sup>f</sup> Isolate BL2009 belonging to clonal lineage US-23 lacks band 17

\* Bands 19 and 22 have not been described in previous reports for US-23 isolate. We decided to include them here because these two bands are seen on all US-23 isolates analyzed.
