# Supplementary material for: An Ephemeral Sexual Population of Phytophthora infestans in the Northeastern United States and Canada
Source: PubMed Central journal article supplement (PMC4281225; doi:10.1371/journal.pone.0116354), 2014-12-31
Supplement: pone.0116354.s007.pdf [file pone.0116354.s007.pdf]

**Table S3. Microsatellite calls for multilocus genotypes (MLGs) of *Phytophthora infestans* used in this study.** The first 16 MLGs in the list are the reference isolates.

| MLG      | D13* |     |   | PiG11 |     |     | Pi04 |     |   | PinfSSR2 |     |   | Pi70 |     |     | Pi4B |     |   | PinfSSR6 |     |   | PinfSSR8 |     |   | Pi02 |     |     | Pi63 |     |     | PinfSSR4 |     |     | PinfSSR11 |     |   |
|----------|------|-----|---|-------|-----|-----|------|-----|---|----------|-----|---|------|-----|-----|------|-----|---|----------|-----|---|----------|-----|---|------|-----|-----|------|-----|-----|----------|-----|-----|-----------|-----|---|
|          | 1    | 2   | 3 | 1     | 2   | 3   | 1    | 2   | 3 | 1        | 2   | 3 | 1    | 2   | 3   | 1    | 2   | 3 | 1        | 2   | 3 | 1        | 2   | 3 | 1    | 2   | 3   | 1    | 2   | 3   | 1        | 2   | 3   | 1         | 2   | 3 |
| US-1     | 136  | 136 | 0 | 154   | 200 | 0   | 166  | 170 | 0 | 173      | 177 | 0 | 189  | 192 | 0   | 213  | 217 | 0 | 242      | 244 | 0 | 266      | 266 | 0 | 266  | 266 | 0   | 273  | 276 | 279 | 288      | 292 | 0   | 341       | 355 | 0 |
| US-6     | 144  | 144 | 0 | 156   | 206 | 0   | 166  | 170 | 0 | 173      | 173 | 0 | 192  | 192 | 0   | 213  | 217 | 0 | 244      | 256 | 0 | 264      | 266 | 0 | 258  | 266 | 0   | 279  | 279 | 0   | 290      | 306 | 0   | 341       | 355 | 0 |
| US-7     | 110  | 110 | 0 | 134   | 156 | 0   | 166  | 170 | 0 | 173      | 173 | 0 | 192  | 192 | 0   | 213  | 213 | 0 | 244      | 244 | 0 | 264      | 266 | 0 | 266  | 268 | 0   | 279  | 279 | 0   | 284      | 298 | 0   | 331       | 341 | 0 |
| US-8     | 108  | 112 | 0 | 156   | 156 | 0   | 166  | 170 | 0 | 173      | 173 | 0 | 192  | 192 | 0   | 213  | 225 | 0 | 244      | 244 | 0 | 260      | 266 | 0 | 266  | 268 | 0   | 279  | 279 | 0   | 284      | 288 | 294 | 341       | 355 | 0 |
| US-11    | 110  | 110 | 0 | 130   | 156 | 0   | 166  | 170 | 0 | 173      | 173 | 0 | 192  | 192 | 0   | 213  | 213 | 0 | 244      | 244 | 0 | 264      | 266 | 0 | 258  | 266 | 268 | 279  | 279 | 0   | 284      | 294 | 306 | 331       | 341 | 0 |
| US-12    | 144  | 148 | 0 | 134   | 156 | 0   | 166  | 170 | 0 | 173      | 173 | 0 | 192  | 192 | 0   | 213  | 213 | 0 | 244      | 256 | 0 | 264      | 264 | 0 | 258  | 266 | 0   | 279  | 279 | 0   | 284      | 294 | 0   | 331       | 355 | 0 |
| US-14    | 108  | 112 | 0 | 156   | 160 | 0   | 166  | 170 | 0 | 173      | 173 | 0 | 192  | 192 | 0   | 213  | 225 | 0 | 244      | 244 | 0 | 260      | 266 | 0 | 266  | 266 | 0   | 279  | 279 | 0   | 288      | 294 | 0   | 341       | 355 | 0 |
| US-16    | 110  | 110 | 0 | 156   | 156 | 0   | 166  | 170 | 0 | 173      | 173 | 0 | 192  | 192 | 0   | 213  | 213 | 0 | 256      | 256 | 0 | 264      | 266 | 0 | 258  | 266 | 0   | 279  | 279 | 0   | 284      | 306 | 0   | 341       | 341 | 0 |
| US-17    | 0    | 0   | 0 | 134   | 156 | 0   | 166  | 170 | 0 | 173      | 173 | 0 | 192  | 192 | 0   | 213  | 213 | 0 | 236      | 244 | 0 | 0        | 0   | 0 | 258  | 266 | 0   | 279  | 279 | 0   | 288      | 288 | 0   | 331       | 355 | 0 |
| US-19    | 110  | 110 | 0 | 134   | 154 | 0   | 166  | 170 | 0 | 173      | 173 | 0 | 192  | 192 | 0   | 213  | 213 | 0 | 244      | 244 | 0 | 260      | 264 | 0 | 266  | 266 | 0   | 279  | 279 | 0   | 288      | 298 | 0   | 355       | 355 | 0 |
| US-20    | 108  | 108 | 0 | 134   | 156 | 0   | 166  | 170 | 0 | 173      | 173 | 0 | 192  | 192 | 0   | 213  | 213 | 0 | 244      | 244 | 0 | 264      | 266 | 0 | 258  | 266 | 0   | 279  | 279 | 0   | 284      | 288 | 0   | 355       | 355 | 0 |
| US-21    | 110  | 110 | 0 | 134   | 134 | 0   | 166  | 170 | 0 | 173      | 173 | 0 | 192  | 192 | 0   | 217  | 217 | 0 | 242      | 244 | 0 | 260      | 260 | 0 | 266  | 268 | 0   | 279  | 279 | 0   | 288      | 286 | 0   | 341       | 341 | 0 |
| US-22    | 0    | 0   | 0 | 134   | 156 | 0   | 166  | 170 | 0 | 173      | 175 | 0 | 192  | 195 | 0   | 213  | 213 | 0 | 242      | 244 | 0 | 260      | 264 | 0 | 266  | 268 | 0   | 279  | 279 | 0   | 294      | 296 | 0   | 341       | 341 | 0 |
| US-23var | 136  | 136 | 0 | 142   | 156 | 206 | 170  | 170 | 0 | 173      | 175 | 0 | 192  | 192 | 0   | 213  | 217 | 0 | 244      | 244 | 0 | 260      | 266 | 0 | 266  | 268 | 270 | 273  | 279 | 0   | 288      | 294 | 296 | 331       | 341 | 0 |
| US-23    | 136  | 136 | 0 | 142   | 156 | 206 | 170  | 170 | 0 | 173      | 175 | 0 | 192  | 192 | 0   | 213  | 217 | 0 | 244      | 244 | 0 | 260      | 266 | 0 | 266  | 268 | 270 | 273  | 279 | 0   | 288      | 294 | 0   | 331       | 341 | 0 |
| US-24    | 108  | 112 | 0 | 156   | 156 | 0   | 166  | 170 | 0 | 173      | 173 | 0 | 192  | 195 | 0   | 217  | 225 | 0 | 244      | 244 | 0 | 260      | 266 | 0 | 266  | 268 | 0   | 279  | 279 | 0   | 284      | 288 | 296 | 341       | 355 | 0 |
| GDT-01   | 110  | 110 | 0 | 134   | 134 | 0   | 166  | 166 | 0 | 173      | 173 | 0 | 192  | 192 | 0   | 213  | 213 | 0 | 242      | 244 | 0 | 260      | 260 | 0 | 258  | 268 | 0   | 279  | 279 | 0   | 288      | 296 | 0   | 341       | 355 | 0 |
| GDT-02   | 0    | 0   | 0 | 134   | 156 | 0   | 166  | 166 | 0 | 173      | 175 | 0 | 189  | 195 | 0   | 213  | 225 | 0 | 242      | 242 | 0 | 260      | 260 | 0 | 258  | 266 | 0   | 279  | 279 | 0   | 284      | 294 | 0   | 341       | 355 | 0 |
| GDT-03   | 110  | 110 | 0 | 134   | 156 | 0   | 166  | 170 | 0 | 173      | 173 | 0 | 189  | 192 | 195 | 213  | 213 | 0 | 242      | 244 | 0 | 260      | 264 | 0 | 258  | 266 | 268 | 279  | 279 | 0   | 288      | 294 | 0   | 341       | 355 | 0 |
| GDT-04   | 110  | 110 | 0 | 134   | 156 | 0   | 166  | 170 | 0 | 173      | 173 | 0 | 189  | 192 | 0   | 213  | 213 | 0 | 242      | 244 | 0 | 260      | 264 | 0 | 258  | 266 | 268 | 279  | 279 | 0   | 284      | 294 | 296 | 341       | 355 | 0 |
| GDT-05   | 0    | 0   | 0 | 156   | 156 | 0   | 166  | 170 | 0 | 173      | 173 | 0 | 192  | 195 | 0   | 213  | 213 | 0 | 242      | 244 | 0 | 260      | 264 | 0 | 258  | 266 | 0   | 279  | 279 | 0   | 288      | 296 | 0   | 341       | 355 | 0 |
| GDT-06   | 110  | 110 | 0 | 156   | 156 | 0   | 166  | 170 | 0 | 173      | 175 | 0 | 192  | 192 | 0   | 213  | 213 | 0 | 242      | 244 | 0 | 260      | 264 | 0 | 258  | 266 | 0   | 279  | 279 | 0   | 284      | 284 | 0   | 341       | 355 | 0 |
| GDT-07   | 0    | 0   | 0 | 156   | 156 | 0   | 166  | 166 | 0 | 173      | 175 | 0 | 192  | 195 | 0   | 213  | 225 | 0 | 242      | 244 | 0 | 260      | 260 | 0 | 258  | 266 | 0   | 279  | 279 | 0   | 288      | 294 | 0   | 341       | 355 | 0 |
| GDT-08   | 0    | 0   | 0 | 134   | 156 | 0   | 166  | 170 | 0 | 173      | 175 | 0 | 189  | 192 | 0   | 213  | 225 | 0 | 242      | 244 | 0 | 260      | 264 | 0 | 266  | 258 | 0   | 279  | 279 | 0   | 288      | 294 | 0   | 341       | 355 | 0 |
| GDT-08.1 | 0    | 0   | 0 | 134   | 156 | 0   | 166  | 170 | 0 | 173      | 175 | 0 | 189  | 192 | 0   | 213  | 225 | 0 | 242      | 244 | 0 | 260      | 264 | 0 | 266  | 268 | 0   | 279  | 279 | 0   | 288      | 292 | 294 | 341       | 355 | 0 |
| GDT-09   | 110  | 110 | 0 | 156   | 156 | 0   | 166  | 170 | 0 | 173      | 173 | 0 | 189  | 192 | 0   | 213  | 213 | 0 | 244      | 244 | 0 | 260      | 264 | 0 | 266  | 266 | 0   | 279  | 279 | 0   | 288      | 294 | 0   | 341       | 355 | 0 |
| GDT-10   | 110  | 110 | 0 | 156   | 156 | 0   | 166  | 170 | 0 | 173      | 173 | 0 | 192  | 192 | 0   | 213  | 213 | 0 | 242      | 244 | 0 | 260      | 264 | 0 | 266  | 266 | 0   | 279  | 279 | 0   | 288      | 294 | 0   | 341       | 355 | 0 |
| GDT-11   | 110  | 110 | 0 | 156   | 156 | 0   | 166  | 170 | 0 | 173      | 173 | 0 | 192  | 192 | 0   | 213  | 213 | 0 | 242      | 242 | 0 | 260      | 264 | 0 | 258  | 266 | 0   | 279  | 279 | 0   | 288      | 294 | 0   | 355       | 355 | 0 |
| GDT-12   | 110  | 110 | 0 | 156   | 156 | 0   | 166  | 170 | 0 | 173      | 173 | 0 | 189  | 192 | 0   | 213  | 225 | 0 | 242      | 244 | 0 | 260      | 260 | 0 | 258  | 266 | 0   | 279  | 279 | 0   | 284      | 288 | 0   | 355       | 355 | 0 |
| GDT-13   | 0    | 0   | 0 | 134   | 156 | 0   | 166  | 166 | 0 | 173      | 173 | 0 | 192  | 195 | 0   | 213  | 225 | 0 | 242      | 244 | 0 | 260      | 260 | 0 | 258  | 266 | 0   | 279  | 279 | 0   | 284      | 294 | 0   | 341       | 355 | 0 |
| GDT-14   | 110  | 110 | 0 | 156   | 156 | 0   | 166  | 170 | 0 | 173      | 175 | 0 | 189  | 192 | 0   | 213  | 225 | 0 | 242      | 244 | 0 | 260      | 264 | 0 | 258  | 266 | 268 | 279  | 279 | 0   | 288      | 294 | 296 | 341       | 355 | 0 |
| GDT-15   | 110  | 110 | 0 | 156   | 156 | 0   | 166  | 170 | 0 | 173      | 175 | 0 | 189  | 192 | 0   | 213  | 213 | 0 | 244      | 244 | 0 | 260      | 264 | 0 | 258  | 268 | 0   | 279  | 279 | 0   | 284      | 294 | 0   | 341       | 355 | 0 |
| GDT-16   | 0    | 0   | 0 | 156   | 156 | 0   | 166  | 166 | 0 | 173      | 173 | 0 | 189  | 192 | 0   | 213  | 213 | 0 | 242      | 244 | 0 | 260      | 264 | 0 | 266  | 266 | 0   | 279  | 279 | 0   | 288      | 296 | 0   | 341       | 355 | 0 |
| GDT-17   | 110  | 110 | 0 | 134   | 156 | 0   | 166  | 170 | 0 | 173      | 173 | 0 | 189  | 192 | 0   | 213  | 213 | 0 | 242      | 244 | 0 | 260      | 264 | 0 | 266  | 266 | 0   | 279  | 279 | 0   | 288      | 296 | 0   | 341       | 355 | 0 |
| GDT-18   | 0    | 0   | 0 | 156   | 156 | 0   | 166  | 166 | 0 | 173      | 175 | 0 | 192  | 195 | 0   | 213  | 225 | 0 | 242      | 242 | 0 | 260      | 260 | 0 | 266  | 268 | 0   | 279  | 279 | 0   | 288      | 296 | 0   | 341       | 355 | 0 |
| GDT-19   | 0    | 0   | 0 | 156   | 156 | 0   | 166  | 170 | 0 | 173      | 173 | 0 | 192  | 195 | 0   | 213  | 225 | 0 | 242      | 244 | 0 | 260      | 260 | 0 | 266  | 266 | 0   | 279  | 279 | 0   | 288      | 294 | 0   | 341       | 355 | 0 |
| GDT-20   | 0    | 0   | 0 | 156   | 156 | 0   | 166  | 166 | 0 | 173      | 175 | 0 | 192  | 192 | 0   | 213  | 225 | 0 | 242      | 242 | 0 | 260      | 260 | 0 | 258  | 268 | 0   | 279  | 279 | 0   | 284      | 294 | 0   | 341       | 355 | 0 |

\* A weak 210 allele is observed for US-23 and a weak 230 allele is observed for some GDT isolates.
