# Supplementary material for: An Ephemeral Sexual Population of Phytophthora infestans in the Northeastern United States and Canada
Source: PubMed Central journal article supplement (PMC4281225; doi:10.1371/journal.pone.0116354), 2014-12-31
Supplement: pone.0116354.s008.pdf [file pone.0116354.s008.pdf]

**Table S4. Polymorphic sites for a gene coding for a conserved hypothetical protein (*PITG\_11126*) in 35 isolates of *Phytophthora infestans*.** Isolates highlighted in yellow are those for which US-22 could not be a parent. Inferred haplotypes are identified with the letter H followed by a number. Total length of the sequence is indicated within parentheses.

| <i>PITG_11126</i> (776 bp) |    |     |     |     |     |     |
|----------------------------|----|-----|-----|-----|-----|-----|
|                            | 49 | 167 | 460 | 549 | 554 | 725 |
| US-1                       | Y  | G   | R   | T   | G   | Y   |
| US-6                       | C  | G   | G   | Y   | R   | C   |
| US-7                       | C  | G   | G   | C   | A   | C   |
| US-8                       | C  | G   | G   | Y   | R   | C   |
| US-11                      | C  | G   | G   | C   | A   | C   |
| US-12                      | C  | G   | G   | Y   | R   | C   |
| US-14                      | C  | G   | G   | Y   | R   | C   |
| US-16                      | C  | G   | G   | C   | A   | C   |
| US-17                      | C  | G   | G   | C   | A   | C   |
| US-19                      | C  | G   | G   | Y   | R   | C   |
| US-20                      | C  | G   | G   | C   | A   | C   |
| US-21                      | C  | G   | G   | T   | G   | C   |
| US-22                      | C  | G   | G   | T   | G   | C   |
| US-23                      | -  | -   | -   | -   | -   | -   |
| US-24                      | C  | G   | G   | Y   | R   | C   |
| GDT-01                     | C  | G   | G   | T   | G   | C   |
| GDT-02                     | C  | R   | G   | Y   | R   | C   |
| GDT-03                     | C  | G   | G   | T   | G   | C   |
| GDT-04                     | C  | A   | G   | C   | A   | C   |
| GDT-05                     | C  | A   | G   | C   | A   | C   |
| GDT-06                     | C  | G   | G   | T   | G   | C   |
| GDT-07                     | C  | G   | G   | T   | G   | C   |
| GDT-08                     | C  | R   | G   | Y   | R   | C   |
| GDT-09                     | C  | A   | G   | C   | A   | C   |
| GDT-10                     | C  | R   | G   | Y   | R   | C   |
| GDT-11                     | C  | R   | G   | Y   | R   | C   |
| GDT-12                     | C  | R   | G   | Y   | R   | C   |
| GDT-13                     | C  | R   | G   | Y   | R   | C   |
| GDT-14                     | C  | R   | G   | Y   | R   | C   |
| GDT-15                     | C  | R   | G   | Y   | R   | C   |
| GDT-16                     | C  | G   | G   | T   | G   | C   |
| GDT-17                     | C  | G   | G   | T   | G   | C   |
| GDT-18                     | C  | R   | G   | Y   | R   | C   |
| GDT-19                     | C  | G   | G   | T   | G   | C   |
| GDT-20                     | C  | R   | G   | Y   | R   | C   |

R = G/A      Y = C/T

|    |   |   |   |   |   |   |
|----|---|---|---|---|---|---|
| H1 | C | G | G | T | G | C |
| H2 | T | G | A | T | G | T |
| H3 | T | G | G | T | G | C |
| H4 | C | A | G | C | A | C |
| H5 | C | G | G | C | A | C |
