# Supplementary material for: An Ephemeral Sexual Population of Phytophthora infestans in the Northeastern United States and Canada
Source: PubMed Central journal article supplement (PMC4281225; doi:10.1371/journal.pone.0116354), 2014-12-31
Supplement: pone.0116354.s009.pdf [file pone.0116354.s009.pdf]

**Table S5. Polymorphic sites for a gene coding for a conserved hypothetical protein (*PUA*) in 35 isolates of *Phytophthora infestans*.** Inferred haplotypes are identified with the letter H followed by a number. Total length of the sequence is indicated within parentheses.

| <i>PUA</i> (609 bp) |         |         |         |         |     |     |     |     |     |
|---------------------|---------|---------|---------|---------|-----|-----|-----|-----|-----|
|                     | 35      | 82      | 187     | 381     | 389 | 532 | 555 | 556 | 586 |
| US-1                | W       | W       | Y       | G       | A   | G   | Y   | W   | A   |
| US-6                | T       | T       | C       | S       | A   | G   | T   | T   | R   |
| US-7                | T       | T       | C       | G       | M   | R   | T   | T   | A   |
| US-8                | T       | T       | C       | G       | C   | A   | T   | T   | A   |
| US-11               | T       | T       | C       | G       | A   | G   | T   | T   | A   |
| US-12               | T       | T       | C       | C       | A   | G   | T   | T   | G   |
| US-14               | T       | T       | C       | G       | C   | A   | T   | T   | A   |
| US-16               | T       | T       | C       | G       | A   | G   | T   | T   | A   |
| US-17               | T       | T       | C       | G       | A   | G   | T   | T   | A   |
| US-19               | T       | T       | C       | S       | A   | G   | T   | T   | R   |
| US-20               | T       | T       | C       | G       | C   | A   | T   | T   | A   |
| US-21               | W       | W       | Y       | S       | M   | R   | T   | T   | A   |
| US-22               | T       | T       | C       | G       | C   | A   | T   | T   | A   |
| US-23               | W       | W       | Y       | S       | M   | R   | Y   | T   | A   |
| US-24               | T       | T       | C       | G       | C   | A   | T   | T   | A   |
| GDT-01              | T       | T       | C       | G       | M   | R   | T   | T   | A   |
| GDT-02              | T       | T       | C       | G       | M   | R   | T   | T   | A   |
| GDT-03              | T       | T       | C       | G       | M   | R   | T   | T   | A   |
| GDT-04              | T       | T       | C       | G       | C   | A   | T   | T   | A   |
| GDT-05              | T       | T       | C       | G       | M   | R   | T   | T   | A   |
| GDT-06              | T       | T       | C       | G       | C   | A   | T   | T   | A   |
| GDT-07              | T       | T       | C       | G       | M   | R   | T   | T   | A   |
| GDT-08              | T       | T       | C       | G       | M   | R   | T   | T   | A   |
| GDT-09              | T       | T       | C       | G       | M   | R   | T   | T   | A   |
| GDT-10              | T       | T       | C       | G       | C   | A   | T   | T   | A   |
| GDT-11              | T       | T       | C       | G       | C   | A   | T   | T   | A   |
| GDT-12              | T       | T       | C       | G       | M   | R   | T   | T   | A   |
| GDT-13              | T       | T       | C       | G       | M   | R   | T   | T   | A   |
| GDT-14              | T       | T       | C       | G       | C   | A   | T   | T   | A   |
| GDT-15              | T       | T       | C       | G       | C   | A   | T   | T   | A   |
| GDT-16              | T       | T       | C       | G       | C   | A   | T   | T   | A   |
| GDT-17              | T       | T       | C       | G       | C   | A   | T   | T   | A   |
| GDT-18              | T       | T       | C       | G       | M   | R   | T   | T   | A   |
| GDT-19              | T       | T       | C       | G       | M   | R   | T   | T   | A   |
| GDT-20              | T       | T       | C       | G       | M   | R   | T   | T   | A   |
| M = C/A             | R = G/A | S = C/G | W = A/T | Y = C/T |     |     |     |     |     |
| H1                  | T       | T       | C       | G       | A   | G   | T   | T   | A   |
| H2                  | T       | T       | C       | C       | A   | G   | T   | T   | G   |
| H3                  | T       | T       | C       | G       | A   | A   | T   | T   | A   |
| H4                  | T       | T       | C       | G       | C   | A   | T   | T   | A   |
| H5                  | A       | A       | T       | G       | A   | G   | C   | T   | A   |
| H6                  | T       | T       | C       | G       | A   | G   | T   | A   | A   |
| H7                  | A       | A       | C       | G       | C   | A   | T   | T   | A   |
| H8                  | A       | A       | T       | C       | A   | A   | T   | T   | A   |
| H9                  | T       | T       | C       | G       | C   | G   | C   | T   | A   |
