# Supplementary material for: An Ephemeral Sexual Population of Phytophthora infestans in the Northeastern United States and Canada
Source: PubMed Central journal article supplement (PMC4281225; doi:10.1371/journal.pone.0116354), 2014-12-31
Supplement: pone.0116354.s010.pdf [file pone.0116354.s010.pdf]

**Table S6. Polymorphic sites for the gene  $\beta$ -tubulin in 35 isolates of *Phytophthora infestans*.** Inferred haplotypes are identified with the letter H followed by a number. Total length of the sequence is indicated within parentheses.

|        | $\beta$ -tubulin (883 bp) |     |     |
|--------|---------------------------|-----|-----|
|        | 583                       | 808 | 829 |
| US-1   | C                         | C   | T   |
| US-6   | C                         | Y   | T   |
| US-7   | Y                         | C   | Y   |
| US-8   | Y                         | C   | Y   |
| US-11  | Y                         | Y   | Y   |
| US-12  | C                         | C   | T   |
| US-14  | Y                         | C   | Y   |
| US-16  | C                         | Y   | T   |
| US-17  | C                         | C   | T   |
| US-19  | Y                         | C   | Y   |
| US-20  | C                         | Y   | T   |
| US-21  | C                         | C   | T   |
| US-22  | Y                         | C   | Y   |
| US-23  | Y                         | C   | Y   |
| US-24  | Y                         | C   | Y   |
| GDT-01 | C                         | Y   | T   |
| GDT-02 | C                         | C   | T   |
| GDT-03 | C                         | C   | T   |
| GDT-04 | T                         | C   | Y   |
| GDT-05 | C                         | C   | T   |
| GDT-06 | C                         | C   | T   |
| GDT-07 | C                         | C   | T   |
| GDT-08 | Y                         | C   | Y   |
| GDT-09 | C                         | C   | T   |
| GDT-10 | C                         | C   | T   |
| GDT-11 | Y                         | C   | Y   |
| GDT-12 | C                         | C   | T   |
| GDT-13 | C                         | C   | T   |
| GDT-14 | Y                         | C   | Y   |
| GDT-15 | C                         | C   | T   |
| GDT-16 | Y                         | C   | Y   |
| GDT-17 | Y                         | C   | Y   |
| GDT-18 | Y                         | C   | Y   |
| GDT-19 | C                         | C   | T   |
| GDT-20 | C                         | C   | T   |

Y = C/T

|    |   |   |   |
|----|---|---|---|
| H1 | C | C | T |
| H2 | C | T | T |
| H3 | T | C | C |
| H4 | T | C | T |
