# Supplementary material for: An Ephemeral Sexual Population of Phytophthora infestans in the Northeastern United States and Canada
Source: PubMed Central journal article supplement (PMC4281225; doi:10.1371/journal.pone.0116354), 2014-12-31
Supplement: pone.0116354.s011.pdf [file pone.0116354.s011.pdf]

**Table S7. Polymorphic sites for the gene coding for the indole-3-glycerolphosphate synthase-*N*-(5'-phosphoribosyl)anthranilate isomerase (*TRP1*) in 35 isolates of *Phytophthora infestans*. Inferred haplotypes are identified with the letter H followed by a number. Total length of the sequence is indicated within parentheses.**

|              | <i>TRP1</i> (824 bp) |          |          |          |          |          |
|--------------|----------------------|----------|----------|----------|----------|----------|
|              | 51                   | 78       | 132      | 563      | 614      | 714      |
| US-1         | R                    | A        | R        | R        | T        | G        |
| US-6         | G                    | A        | A        | A        | W        | G        |
| US-7         | G                    | A        | G        | G        | T        | G        |
| US-8         | G                    | A        | G        | G        | T        | G        |
| US-11        | G                    | R        | R        | R        | T        | G        |
| US-12        | G                    | A        | R        | R        | W        | G        |
| US-14        | G                    | A        | G        | G        | T        | G        |
| US-16        | G                    | A        | R        | R        | T        | G        |
| US-17        | G                    | A        | R        | R        | T        | G        |
| US-19        | G                    | A        | R        | R        | T        | G        |
| US-20        | G                    | A        | R        | R        | T        | G        |
| US-21        | G                    | A        | G        | R        | T        | G        |
| <b>US-22</b> | <b>G</b>             | <b>A</b> | <b>R</b> | <b>G</b> | <b>T</b> | <b>G</b> |
| US-23        | G                    | A        | R        | R        | T        | R        |
| US-24        | G                    | A        | R        | G        | T        | G        |
| GDT-01       | G                    | A        | G        | G        | T        | G        |
| GDT-02       | G                    | A        | R        | G        | T        | G        |
| GDT-03       | G                    | A        | G        | G        | T        | G        |
| GDT-04       | G                    | A        | G        | G        | T        | G        |
| GDT-05       | G                    | A        | R        | G        | T        | G        |
| GDT-06       | G                    | A        | G        | G        | T        | G        |
| GDT-07       | G                    | A        | R        | G        | T        | G        |
| GDT-08       | G                    | A        | G        | G        | T        | G        |
| GDT-09       | G                    | A        | G        | G        | T        | G        |
| GDT-10       | G                    | A        | R        | G        | T        | G        |
| GDT-11       | G                    | A        | G        | G        | T        | G        |
| GDT-12       | G                    | A        | G        | G        | T        | G        |
| GDT-13       | G                    | A        | G        | G        | T        | G        |
| GDT-14       | G                    | A        | G        | G        | T        | G        |
| GDT-15       | G                    | A        | R        | G        | T        | G        |
| GDT-16       | G                    | A        | G        | G        | T        | G        |
| GDT-17       | G                    | A        | G        | G        | T        | G        |
| GDT-18       | G                    | A        | G        | G        | T        | G        |
| GDT-19       | G                    | A        | R        | G        | T        | G        |
| GDT-20       | G                    | A        | G        | G        | T        | G        |

R = G/A      W = A/T

|    |   |   |   |   |   |   |
|----|---|---|---|---|---|---|
| H1 | G | A | G | G | T | A |
| H2 | G | A | G | A | T | G |
| H3 | G | A | A | A | T | G |
| H4 | G | G | A | A | T | G |
| H5 | G | A | G | G | T | G |
| H6 | A | A | A | A | T | G |
| H7 | G | A | A | A | A | G |
| H8 | G | A | A | G | T | G |
