# Supplementary material for: An Ephemeral Sexual Population of Phytophthora infestans in the Northeastern United States and Canada
Source: PubMed Central journal article supplement (PMC4281225; doi:10.1371/journal.pone.0116354), 2014-12-31
Supplement: pone.0116354.s012.pdf [file pone.0116354.s012.pdf]

**Table S8. Microsatellite allele names and sizes for the twelve-microsatellite loci used in this study.** Allele sizes can differ slightly from one laboratory to another because of different equipment. In order to compare across locations, the community uses common standards to identify alleles. This sometimes results in an allele name being slightly different from the detected size. This keeps the allele names consistent with earlier publications [26].

|       |                    |            |            |            |            |            |            |            |            |
|-------|--------------------|------------|------------|------------|------------|------------|------------|------------|------------|
| D13   | <b>Allele name</b> | <b>108</b> | <b>110</b> | <b>112</b> | <b>136</b> | <b>144</b> | <b>148</b> |            |            |
|       | Allele size        | 106        | 108        | 110        | 135        | 143        | 148        |            |            |
| PiG11 | <b>Allele name</b> | <b>130</b> | <b>134</b> | <b>142</b> | <b>154</b> | <b>156</b> | <b>160</b> | <b>200</b> | <b>206</b> |
|       | Allele size        | 130        | 134        | 142        | 155        | 157        | 161        | 200        | 206        |
| Pi04  | <b>Allele name</b> | <b>166</b> | <b>170</b> |            |            |            |            |            |            |
|       | Allele size        | 171        | 175        |            |            |            |            |            |            |
| SSR2  | <b>Allele name</b> | <b>173</b> | <b>175</b> | <b>177</b> |            |            |            |            |            |
|       | Allele size        | 173        | 175        | 177        |            |            |            |            |            |
| Pi70  | <b>Allele name</b> | <b>189</b> | <b>192</b> | <b>195</b> |            |            |            |            |            |
|       | Allele size        | 188        | 191        | 194        |            |            |            |            |            |
| Pi4B  | <b>Allele name</b> | <b>213</b> | <b>217</b> | <b>225</b> |            |            |            |            |            |
|       | Allele size        | 216        | 220        | 228        |            |            |            |            |            |
| SSR6  | <b>Allele name</b> | <b>236</b> | <b>242</b> | <b>244</b> | <b>256</b> |            |            |            |            |
|       | Allele size        | 238        | 244        | 246        | 258        |            |            |            |            |
| SSR8  | <b>Allele name</b> | <b>260</b> | <b>264</b> | <b>266</b> |            |            |            |            |            |
|       | Allele size        | 262        | 266        | 268        |            |            |            |            |            |
| Pi02  | <b>Allele name</b> | <b>258</b> | <b>266</b> | <b>268</b> | <b>270</b> |            |            |            |            |
|       | Allele size        | 260        | 268        | 270        | 272        |            |            |            |            |
| Pi63  | <b>Allele name</b> | <b>273</b> | <b>276</b> | <b>279</b> |            |            |            |            |            |
|       | Allele size        | 272        | 275        | 280        |            |            |            |            |            |
| SSR4  | <b>Allele name</b> | <b>284</b> | <b>288</b> | <b>290</b> | <b>292</b> | <b>294</b> | <b>296</b> | <b>298</b> | <b>306</b> |
|       | Allele size        | 284        | 288        | 290        | 292        | 294        | 296        | 298        | 306        |
| SSR11 | <b>Allele name</b> | <b>331</b> | <b>341</b> | <b>355</b> |            |            |            |            |            |
|       | Allele size        | 331        | 341        | 356        |            |            |            |            |            |
