# Supplementary material for: An Ephemeral Sexual Population of Phytophthora infestans in the Northeastern United States and Canada
Source: PubMed Central journal article supplement (PMC4281225; doi:10.1371/journal.pone.0116354), 2014-12-31
Supplement: pone.0116354.s013.pdf [file pone.0116354.s013.pdf]

**Table S9. Microsatellite calls for multilocus genotypes (MLGs) of *Phytophthora infestans* used in this study.** Isolates highlighted in grey are those for which US-22 could not be a parent. The alleles shown in red are those not present in US-22.

| MLG             | D13      |          |          | PiG11      |            |          | Pi04       |            |          | PinfSSR2   |            |          | Pi70       |            |          | Pi4B       |            |          | PinfSSR6   |            |          | PinfSSR8   |            |          | Pi02       |            |          | Pi63       |            |          | PinfSSR4   |            |          | PinfSSR11  |            |          |
|-----------------|----------|----------|----------|------------|------------|----------|------------|------------|----------|------------|------------|----------|------------|------------|----------|------------|------------|----------|------------|------------|----------|------------|------------|----------|------------|------------|----------|------------|------------|----------|------------|------------|----------|------------|------------|----------|
|                 | 1        | 2        | 3        | 1          | 2          | 3        | 1          | 2          | 3        | 1          | 2          | 3        | 1          | 2          | 3        | 1          | 2          | 3        | 1          | 2          | 3        | 1          | 2          | 3        | 1          | 2          | 3        | 1          | 2          | 3        | 1          | 2          | 3        | 1          | 2          | 3        |
| <b>US-22</b>    | <b>0</b> | <b>0</b> | <b>0</b> | <b>134</b> | <b>156</b> | <b>0</b> | <b>166</b> | <b>170</b> | <b>0</b> | <b>173</b> | <b>175</b> | <b>0</b> | <b>192</b> | <b>195</b> | <b>0</b> | <b>213</b> | <b>213</b> | <b>0</b> | <b>242</b> | <b>244</b> | <b>0</b> | <b>260</b> | <b>264</b> | <b>0</b> | <b>266</b> | <b>268</b> | <b>0</b> | <b>279</b> | <b>279</b> | <b>0</b> | <b>294</b> | <b>296</b> | <b>0</b> | <b>341</b> | <b>341</b> | <b>0</b> |
| <b>GDT-01</b>   | 110      | 110      | 0        | 134        | 134        | 0        | 166        | 166        | 0        | 173        | 173        | 0        | 192        | 192        | 0        | 213        | 213        | 0        | 242        | 244        | 0        | 260        | 260        | 0        | 258        | 268        | 0        | 279        | 279        | 0        | 288        | 296        | 0        | 341        | 355        | 0        |
| <b>GDT-02</b>   | 0        | 0        | 0        | 134        | 156        | 0        | 166        | 166        | 0        | 173        | 175        | 0        | 189        | 195        | 0        | 213        | 225        | 0        | 242        | 242        | 0        | 260        | 260        | 0        | 258        | 266        | 0        | 279        | 279        | 0        | 284        | 294        | 0        | 341        | 355        | 0        |
| <b>GDT-03</b>   | 110      | 110      | 0        | 134        | 156        | 0        | 166        | 170        | 0        | 173        | 173        | 0        | 189        | 192        | 195      | 213        | 213        | 0        | 242        | 244        | 0        | 260        | 264        | 0        | 258        | 266        | 268      | 279        | 279        | 0        | 288        | 294        | 0        | 341        | 355        | 0        |
| <b>GDT-04</b>   | 110      | 110      | 0        | 134        | 156        | 0        | 166        | 170        | 0        | 173        | 173        | 0        | 189        | 192        | 0        | 213        | 213        | 0        | 242        | 244        | 0        | 260        | 264        | 0        | 258        | 266        | 268      | 279        | 279        | 0        | 284        | 294        | 296      | 341        | 355        | 0        |
| <b>GDT-05</b>   | 0        | 0        | 0        | 156        | 156        | 0        | 166        | 170        | 0        | 173        | 173        | 0        | 192        | 195        | 0        | 213        | 213        | 0        | 242        | 244        | 0        | 260        | 264        | 0        | 258        | 266        | 0        | 279        | 279        | 0        | 288        | 296        | 0        | 341        | 355        | 0        |
| <b>GDT-06</b>   | 110      | 110      | 0        | 156        | 156        | 0        | 166        | 170        | 0        | 173        | 175        | 0        | 192        | 192        | 0        | 213        | 213        | 0        | 242        | 244        | 0        | 260        | 264        | 0        | 258        | 266        | 0        | 279        | 279        | 0        | 284        | 284        | 0        | 341        | 355        | 0        |
| <b>GDT-07</b>   | 0        | 0        | 0        | 156        | 156        | 0        | 166        | 166        | 0        | 173        | 175        | 0        | 192        | 195        | 0        | 213        | 225        | 0        | 242        | 244        | 0        | 260        | 260        | 0        | 258        | 266        | 0        | 279        | 279        | 0        | 288        | 294        | 0        | 341        | 355        | 0        |
| <b>GDT-08</b>   | 0        | 0        | 0        | 134        | 156        | 0        | 166        | 170        | 0        | 173        | 175        | 0        | 189        | 192        | 0        | 213        | 225        | 0        | 242        | 244        | 0        | 260        | 264        | 0        | 266        | 258        | 0        | 279        | 279        | 0        | 288        | 294        | 0        | 341        | 355        | 0        |
| <b>GDT-08.1</b> | 0        | 0        | 0        | 134        | 156        | 0        | 166        | 170        | 0        | 173        | 175        | 0        | 189        | 192        | 0        | 213        | 225        | 0        | 242        | 244        | 0        | 260        | 264        | 0        | 266        | 268        | 0        | 279        | 279        | 0        | 288        | 292        | 294      | 341        | 355        | 0        |
| <b>GDT-09</b>   | 110      | 110      | 0        | 156        | 156        | 0        | 166        | 170        | 0        | 173        | 173        | 0        | 189        | 192        | 0        | 213        | 213        | 0        | 244        | 244        | 0        | 260        | 264        | 0        | 266        | 266        | 0        | 279        | 279        | 0        | 288        | 294        | 0        | 341        | 355        | 0        |
| <b>GDT-10</b>   | 110      | 110      | 0        | 156        | 156        | 0        | 166        | 170        | 0        | 173        | 173        | 0        | 192        | 192        | 0        | 213        | 213        | 0        | 242        | 244        | 0        | 260        | 264        | 0        | 266        | 266        | 0        | 279        | 279        | 0        | 288        | 294        | 0        | 341        | 355        | 0        |
| <b>GDT-11</b>   | 110      | 110      | 0        | 156        | 156        | 0        | 166        | 170        | 0        | 173        | 173        | 0        | 192        | 192        | 0        | 213        | 213        | 0        | 242        | 242        | 0        | 260        | 264        | 0        | 258        | 266        | 0        | 279        | 279        | 0        | 288        | 294        | 0        | 355        | 355        | 0        |
| <b>GDT-12</b>   | 110      | 110      | 0        | 156        | 156        | 0        | 166        | 170        | 0        | 173        | 173        | 0        | 189        | 192        | 0        | 213        | 225        | 0        | 242        | 244        | 0        | 260        | 260        | 0        | 258        | 266        | 0        | 279        | 279        | 0        | 284        | 288        | 0        | 355        | 355        | 0        |
| <b>GDT-13</b>   | 0        | 0        | 0        | 134        | 156        | 0        | 166        | 166        | 0        | 173        | 173        | 0        | 192        | 195        | 0        | 213        | 225        | 0        | 242        | 244        | 0        | 260        | 260        | 0        | 258        | 266        | 0        | 279        | 279        | 0        | 284        | 294        | 0        | 341        | 355        | 0        |
| <b>GDT-14</b>   | 110      | 110      | 0        | 156        | 156        | 0        | 166        | 170        | 0        | 173        | 175        | 0        | 189        | 192        | 0        | 213        | 225        | 0        | 242        | 244        | 0        | 260        | 264        | 0        | 258        | 266        | 268      | 279        | 279        | 0        | 288        | 294        | 296      | 341        | 355        | 0        |
| <b>GDT-15</b>   | 110      | 110      | 0        | 156        | 156        | 0        | 166        | 170        | 0        | 173        | 175        | 0        | 189        | 192        | 0        | 213        | 213        | 0        | 244        | 244        | 0        | 260        | 264        | 0        | 258        | 268        | 0        | 279        | 279        | 0        | 284        | 294        | 0        | 341        | 355        | 0        |
| <b>GDT-16</b>   | 0        | 0        | 0        | 156        | 156        | 0        | 166        | 166        | 0        | 173        | 173        | 0        | 189        | 192        | 0        | 213        | 213        | 0        | 242        | 244        | 0        | 260        | 264        | 0        | 266        | 266        | 0        | 279        | 279        | 0        | 288        | 296        | 0        | 341        | 355        | 0        |
| <b>GDT-17</b>   | 110      | 110      | 0        | 134        | 156        | 0        | 166        | 170        | 0        | 173        | 173        | 0        | 189        | 192        | 0        | 213        | 213        | 0        | 242        | 244        | 0        | 260        | 264        | 0        | 266        | 266        | 0        | 279        | 279        | 0        | 288        | 296        | 0        | 341        | 355        | 0        |
| <b>GDT-18</b>   | 0        | 0        | 0        | 156        | 156        | 0        | 166        | 166        | 0        | 173        | 175        | 0        | 192        | 195        | 0        | 213        | 225        | 0        | 242        | 242        | 0        | 260        | 260        | 0        | 266        | 268        | 0        | 279        | 279        | 0        | 288        | 296        | 0        | 341        | 355        | 0        |
| <b>GDT-19</b>   | 0        | 0        | 0        | 156        | 156        | 0        | 166        | 170        | 0        | 173        | 173        | 0        | 192        | 195        | 0        | 213        | 225        | 0        | 242        | 244        | 0        | 260        | 260        | 0        | 266        | 266        | 0        | 279        | 279        | 0        | 288        | 294        | 0        | 341        | 355        | 0        |
| <b>GDT-20</b>   | 0        | 0        | 0        | 156        | 156        | 0        | 166        | 166        | 0        | 173        | 175        | 0        | 192        | 192        | 0        | 213        | 225        | 0        | 242        | 242        | 0        | 260        | 260        | 0        | 258        | 268        | 0        | 279        | 279        | 0        | 284        | 294        | 0        | 341        | 355        | 0        |
