# Supplementary material for: An Ephemeral Sexual Population of Phytophthora infestans in the Northeastern United States and Canada
Source: PubMed Central journal article supplement (PMC4281225; doi:10.1371/journal.pone.0116354), 2014-12-31
Supplement: pone.0116354.s014.pdf [file pone.0116354.s014.pdf]

**Table S10. Microsatellite calls for multilocus genotypes (MLGs) of *Phytophthora infestans* used in this study.** Isolates highlighted in grey are those for which US-11 could not be a parent. The alleles shown in red are those not present in US-11.

| MLG           | D13        |            |          | PiG11      |            |          | Pi04       |            |          | PinfSSR2   |            |          | Pi70       |            |          | Pi4B       |            |          | PinfSSR6   |            |          | PinfSSR8   |            |          | Pi02       |            |            | Pi63       |            |          | PinfSSR4   |            |            | PinfSSR11  |            |          |
|---------------|------------|------------|----------|------------|------------|----------|------------|------------|----------|------------|------------|----------|------------|------------|----------|------------|------------|----------|------------|------------|----------|------------|------------|----------|------------|------------|------------|------------|------------|----------|------------|------------|------------|------------|------------|----------|
|               | 1          | 2          | 3        | 1          | 2          | 3        | 1          | 2          | 3        | 1          | 2          | 3        | 1          | 2          | 3        | 1          | 2          | 3        | 1          | 2          | 3        | 1          | 2          | 3        | 1          | 2          | 3          | 1          | 2          | 3        | 1          | 2          | 3          | 1          | 2          | 3        |
| <b>US-11</b>  | <b>110</b> | <b>110</b> | <b>0</b> | <b>130</b> | <b>156</b> | <b>0</b> | <b>166</b> | <b>170</b> | <b>0</b> | <b>173</b> | <b>173</b> | <b>0</b> | <b>192</b> | <b>192</b> | <b>0</b> | <b>213</b> | <b>213</b> | <b>0</b> | <b>244</b> | <b>244</b> | <b>0</b> | <b>264</b> | <b>266</b> | <b>0</b> | <b>258</b> | <b>266</b> | <b>268</b> | <b>279</b> | <b>279</b> | <b>0</b> | <b>284</b> | <b>294</b> | <b>306</b> | <b>331</b> | <b>341</b> | <b>0</b> |
| GDT-01        | 110        | 110        | 0        | 134        | 134        | 0        | 166        | 166        | 0        | 173        | 173        | 0        | 192        | 192        | 0        | 213        | 213        | 0        | 242        | 244        | 0        | 260        | 260        | 0        | 258        | 268        | 0          | 279        | 279        | 0        | 288        | 296        | 0          | 341        | 355        | 0        |
| GDT-02        | 0          | 0          | 0        | 134        | 156        | 0        | 166        | 166        | 0        | 173        | 175        | 0        | 189        | 195        | 0        | 213        | 225        | 0        | 242        | 242        | 0        | 260        | 260        | 0        | 258        | 266        | 0          | 279        | 279        | 0        | 284        | 294        | 0          | 341        | 355        | 0        |
| <b>GDT-03</b> | 110        | 110        | 0        | 134        | 156        | 0        | 166        | 170        | 0        | 173        | 173        | 0        | 189        | 192        | 195      | 213        | 213        | 0        | 242        | 244        | 0        | 260        | 264        | 0        | 258        | 266        | 268        | 279        | 279        | 0        | 288        | 294        | 0          | 341        | 355        | 0        |
| <b>GDT-04</b> | 110        | 110        | 0        | 134        | 156        | 0        | 166        | 170        | 0        | 173        | 173        | 0        | 189        | 192        | 0        | 213        | 213        | 0        | 242        | 244        | 0        | 260        | 264        | 0        | 258        | 266        | 268        | 279        | 279        | 0        | 284        | 294        | 296        | 341        | 355        | 0        |
| GDT-05        | 0          | 0          | 0        | 156        | 156        | 0        | 166        | 170        | 0        | 173        | 173        | 0        | 192        | 195        | 0        | 213        | 213        | 0        | 242        | 244        | 0        | 260        | 264        | 0        | 258        | 266        | 0          | 279        | 279        | 0        | 288        | 296        | 0          | 341        | 355        | 0        |
| <b>GDT-06</b> | 110        | 110        | 0        | 156        | 156        | 0        | 166        | 170        | 0        | 173        | 175        | 0        | 192        | 192        | 0        | 213        | 213        | 0        | 242        | 244        | 0        | 260        | 264        | 0        | 258        | 266        | 0          | 279        | 279        | 0        | 284        | 284        | 0          | 341        | 355        | 0        |
| GDT-07        | 0          | 0          | 0        | 156        | 156        | 0        | 166        | 166        | 0        | 173        | 175        | 0        | 192        | 195        | 0        | 213        | 225        | 0        | 242        | 244        | 0        | 260        | 260        | 0        | 258        | 266        | 0          | 279        | 279        | 0        | 288        | 294        | 0          | 341        | 355        | 0        |
| GDT-08        | 0          | 0          | 0        | 134        | 156        | 0        | 166        | 170        | 0        | 173        | 175        | 0        | 189        | 192        | 0        | 213        | 225        | 0        | 242        | 244        | 0        | 260        | 264        | 0        | 266        | 258        | 0          | 279        | 279        | 0        | 288        | 294        | 0          | 341        | 355        | 0        |
| GDT-08.1      | 0          | 0          | 0        | 134        | 156        | 0        | 166        | 170        | 0        | 173        | 175        | 0        | 189        | 192        | 0        | 213        | 225        | 0        | 242        | 244        | 0        | 260        | 264        | 0        | 266        | 268        | 0          | 279        | 279        | 0        | 288        | 292        | 294        | 341        | 355        | 0        |
| <b>GDT-09</b> | 110        | 110        | 0        | 156        | 156        | 0        | 166        | 170        | 0        | 173        | 173        | 0        | 189        | 192        | 0        | 213        | 213        | 0        | 244        | 244        | 0        | 260        | 264        | 0        | 266        | 266        | 0          | 279        | 279        | 0        | 288        | 294        | 0          | 341        | 355        | 0        |
| <b>GDT-10</b> | 110        | 110        | 0        | 156        | 156        | 0        | 166        | 170        | 0        | 173        | 173        | 0        | 192        | 192        | 0        | 213        | 213        | 0        | 242        | 244        | 0        | 260        | 264        | 0        | 266        | 266        | 0          | 279        | 279        | 0        | 288        | 294        | 0          | 341        | 355        | 0        |
| GDT-11        | 110        | 110        | 0        | 156        | 156        | 0        | 166        | 170        | 0        | 173        | 173        | 0        | 192        | 192        | 0        | 213        | 213        | 0        | 242        | 242        | 0        | 260        | 264        | 0        | 258        | 266        | 0          | 279        | 279        | 0        | 288        | 294        | 0          | 355        | 355        | 0        |
| GDT-12        | 110        | 110        | 0        | 156        | 156        | 0        | 166        | 170        | 0        | 173        | 173        | 0        | 189        | 192        | 0        | 213        | 225        | 0        | 242        | 244        | 0        | 260        | 260        | 0        | 258        | 266        | 0          | 279        | 279        | 0        | 284        | 288        | 0          | 355        | 355        | 0        |
| GDT-13        | 0          | 0          | 0        | 134        | 156        | 0        | 166        | 166        | 0        | 173        | 173        | 0        | 192        | 195        | 0        | 213        | 225        | 0        | 242        | 244        | 0        | 260        | 260        | 0        | 258        | 266        | 0          | 279        | 279        | 0        | 284        | 294        | 0          | 341        | 355        | 0        |
| <b>GDT-14</b> | 110        | 110        | 0        | 156        | 156        | 0        | 166        | 170        | 0        | 173        | 175        | 0        | 189        | 192        | 0        | 213        | 225        | 0        | 242        | 244        | 0        | 260        | 264        | 0        | 258        | 266        | 268        | 279        | 279        | 0        | 288        | 294        | 296        | 341        | 355        | 0        |
| <b>GDT-15</b> | 110        | 110        | 0        | 156        | 156        | 0        | 166        | 170        | 0        | 173        | 175        | 0        | 189        | 192        | 0        | 213        | 213        | 0        | 244        | 244        | 0        | 260        | 264        | 0        | 258        | 268        | 0          | 279        | 279        | 0        | 284        | 294        | 0          | 341        | 355        | 0        |
| GDT-16        | 0          | 0          | 0        | 156        | 156        | 0        | 166        | 166        | 0        | 173        | 173        | 0        | 189        | 192        | 0        | 213        | 213        | 0        | 242        | 244        | 0        | 260        | 264        | 0        | 266        | 266        | 0          | 279        | 279        | 0        | 288        | 296        | 0          | 341        | 355        | 0        |
| GDT-17        | 110        | 110        | 0        | 134        | 156        | 0        | 166        | 170        | 0        | 173        | 173        | 0        | 189        | 192        | 0        | 213        | 213        | 0        | 242        | 244        | 0        | 260        | 264        | 0        | 266        | 266        | 0          | 279        | 279        | 0        | 288        | 296        | 0          | 341        | 355        | 0        |
| GDT-18        | 0          | 0          | 0        | 156        | 156        | 0        | 166        | 166        | 0        | 173        | 175        | 0        | 192        | 195        | 0        | 213        | 225        | 0        | 242        | 242        | 0        | 260        | 260        | 0        | 266        | 268        | 0          | 279        | 279        | 0        | 288        | 296        | 0          | 341        | 355        | 0        |
| GDT-19        | 0          | 0          | 0        | 156        | 156        | 0        | 166        | 170        | 0        | 173        | 173        | 0        | 192        | 195        | 0        | 213        | 225        | 0        | 242        | 244        | 0        | 260        | 260        | 0        | 266        | 266        | 0          | 279        | 279        | 0        | 288        | 294        | 0          | 341        | 355        | 0        |
| GDT-20        | 0          | 0          | 0        | 156        | 156        | 0        | 166        | 166        | 0        | 173        | 175        | 0        | 192        | 192        | 0        | 213        | 225        | 0        | 242        | 242        | 0        | 260        | 260        | 0        | 258        | 268        | 0          | 279        | 279        | 0        | 284        | 294        | 0          | 341        | 355        | 0        |
