# Supplementary material for: An Ephemeral Sexual Population of Phytophthora infestans in the Northeastern United States and Canada
Source: PubMed Central journal article supplement (PMC4281225; doi:10.1371/journal.pone.0116354), 2014-12-31
Supplement: pone.0116354.s016.pdf [file pone.0116354.s016.pdf]

**Table S12. Possible genotypes of loci *PITG\_11126*, *PUA*,  $\beta$ -*tubulin* and *TRP1* of putative parents for the GDT isolates when assuming that lineage US-22 is one of the parental genotypes for these isolates.** In red we show the alleles that the alternate parent or parents must possess to give rise to the genotypic profiles observed in the NYS-2010/11 isolates when assuming that lineage US-22 is one of the parental genotypes for these isolates.

|                        | <i>PITG_11126</i> (776 bp) |       |     |       |       |     | <i>PUA</i> (609 bp) |    |     |     |     |       |       |     |     | $\beta$ - <i>tubulin</i> (883 bp) |       |       | <i>TRP1</i> (824 bp) |    |    |       |     |     |     |
|------------------------|----------------------------|-------|-----|-------|-------|-----|---------------------|----|-----|-----|-----|-------|-------|-----|-----|-----------------------------------|-------|-------|----------------------|----|----|-------|-----|-----|-----|
| Polymorphic site       | 49                         | 167   | 460 | 549   | 554   | 725 | 35                  | 82 | 187 | 381 | 382 | 389   | 532   | 555 | 556 | 586                               | 583   | 808   | 829                  | 51 | 78 | 132   | 563 | 614 | 714 |
| <b>US-22</b>           | C                          | G     | G   | T     | G     | C   | T                   | T  | C   | G   | G   | C     | A     | T   | T   | A                                 | Y     | C     | Y                    | G  | A  | R     | G   | T   | G   |
| <b>GDTs</b>            | C                          | G/R/A | G   | T/Y/C | G/R/A | C   | T                   | T  | C   | G   | G   | C/M   | A/R   | T   | T   | T                                 | C/Y/T | C/Y   | T/Y                  | G  | A  | G/R   | G   | T   | G   |
| <b>Other parent(s)</b> | C                          | G/R/A | G   | T/Y/C | G/R/A | C   | T                   | T  | C   | G   | G   | C/M/A | G/R/A | T   | T   | T                                 | C/Y/T | C/Y/T | C/Y/T                | G  | A  | G/R/A | G   | T   | G   |
