# Supplementary material for: An Ephemeral Sexual Population of Phytophthora infestans in the Northeastern United States and Canada
Source: PLoS One. 2014 Dec 31;9(12):e116354. doi: 10.1371/journal.pone.0116354 (PMC4281225; doi:10.1371/journal.pone.0116354)
Supplement: S11 Table — Possible genotypes for the allozyme glucose-6-phosphate isomerase and microsatellite loci of putative parents for the GDT isolates when assuming that lineage US-22 is one of the parental genotypes for these isolates. Clonal lineage US-22 could not be excluded as a potential parent for 17 of the 20 NYS-2010/11 isolates based on the banding patterns for the allozyme glucose-6-phosphate isomerase and microsatellite data. In red we show the alleles that the alternate parent or parents must possess to give rise to the genotypic profiles observed in the NYS-2010/11 isolates when assuming that lineage US-22 is one of the parental genotypes for these isolates. (PDF) [file pone.0116354.s015.pdf]

**Table S11. Possible genotypes for the allozyme *glucose-6-phosphate isomerase* and microsatellite loci of putative parents for the GDT isolates when assuming that lineage US-22 is one of the parental genotypes for these isolates.** Clonal lineage US-22 could not be excluded as a potential parent for 17 of the 20 NYS-2010/11 isolates based on the banding patterns for the allozyme *glucose-6-phosphate isomerase* and microsatellite data. In red we show the alleles that the alternate parent or parents must possess to give rise to the genotypic profiles observed in the NYS-2010/11 isolates when assuming that lineage US-22 is one of the parental genotypes for these isolates.

| Alleles present | GPI |     |     | Mating type | Microsatellite loci |         |         |          |             |         |          |          |             |         |                 |           |
|-----------------|-----|-----|-----|-------------|---------------------|---------|---------|----------|-------------|---------|----------|----------|-------------|---------|-----------------|-----------|
|                 |     |     |     |             | D13                 | PiG11   | Pi04    | PinfSSR2 | Pi70        | Pi4B    | PinfSSR6 | PinfSSR8 | Pi02        | Pi63    | PinfSSR4        | PinfSSR11 |
| US-22           | 100 | 122 | A2  | 0           | 134/156             | 166/170 | 173/175 | 192/195  | 213         | 242/244 | 260/264  | 266/268  | 279         | 294/296 | 341             |           |
| GDTs            | 100 | 111 | 122 | A1/A2       | 0/110               | 134/156 | 166/170 | 173/175  | 189/192/195 | 213/225 | 242/244  | 260/264  | 258/266/268 | 279     | 284/288/294/296 | 341/355   |
| Other parent(s) | 111 |     | A1  | 110         | 134/156             | 166/170 | 173/175 | 189      | 225         | 242/244 | 260/264  | 258      | 279         | 284/288 | 355             |           |
